# Supplementary material for: A fiber-optic sorbitol biosensor based on NADH fluorescence detection toward rapid diagnosis of diabetic complications
Source: Royal Society of Chemistry journal article supplement (doi:10.1039/c4an01593b), 2015-01-01
Supplement: c4an01593b1.pdf [file c4an01593b1.pdf]

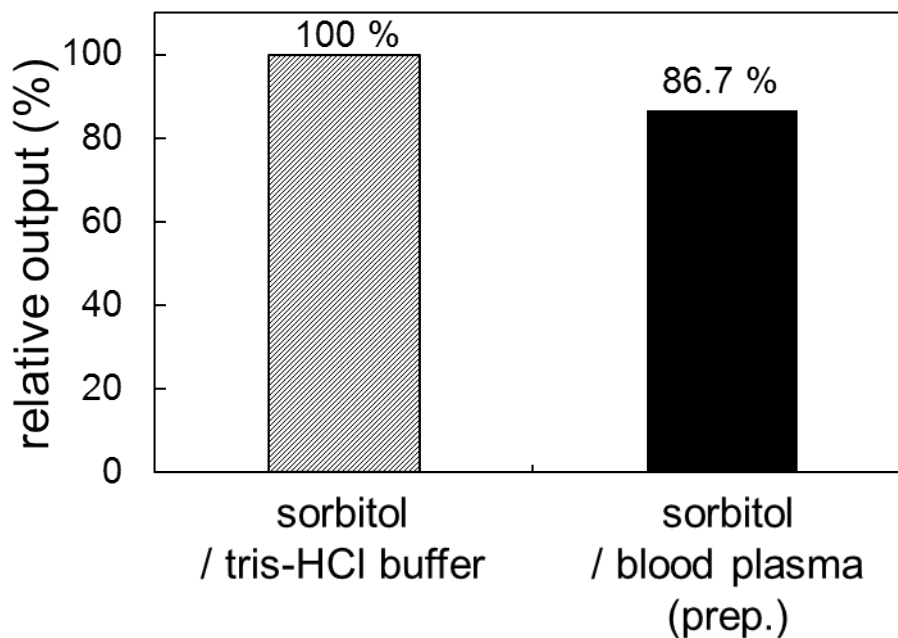

**Supplemental figure 1**

**Comparison of the biosensor output to sorbitol in buffer solution or blood plasma. The final concentration of sorbitol was 100  $\mu\text{mol/L}$  in all samples. When the output of the sorbitol biosensor for sorbitol standard solution was 100%, the sensor output in pre-treated blood plasma was 86.7%.**
